# Supplementary material for: Behavioural elements and sensory cues involved in sexual isolation between Drosophila melanogaster strains
Source: PubMed Central journal article supplement (PMC5990781; doi:10.1098/rsos.172060), 2018-05-09

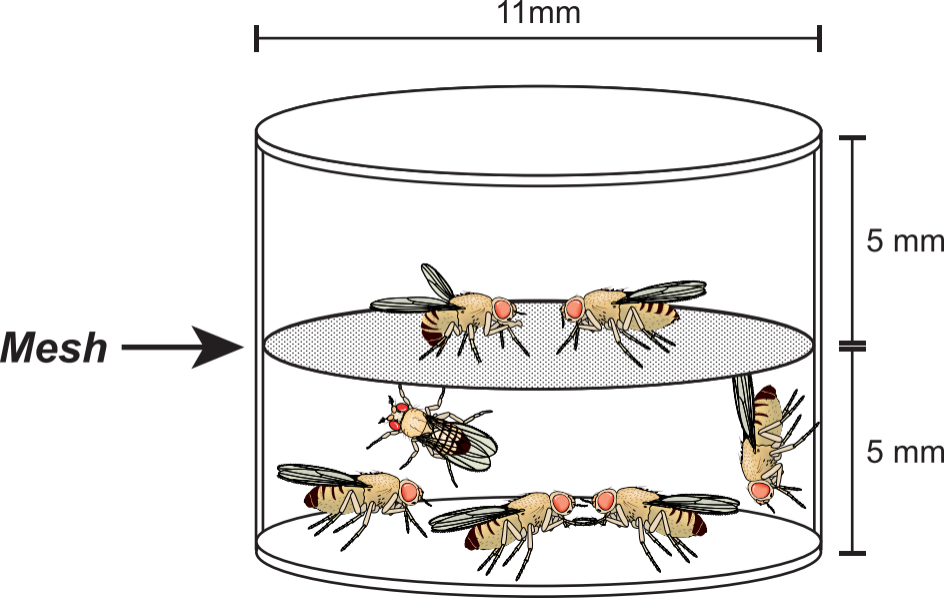

Supplement: rsos172060supp1.pdf [file rsos172060supp1.pdf]
