# Supplementary material for: Behavioural elements and sensory cues involved in sexual isolation between Drosophila melanogaster strains
Source: PubMed Central journal article supplement (PMC5990781; doi:10.1098/rsos.172060), 2018-05-09
Supplement: rsos172060supp2.pdf [file rsos172060supp2.pdf]

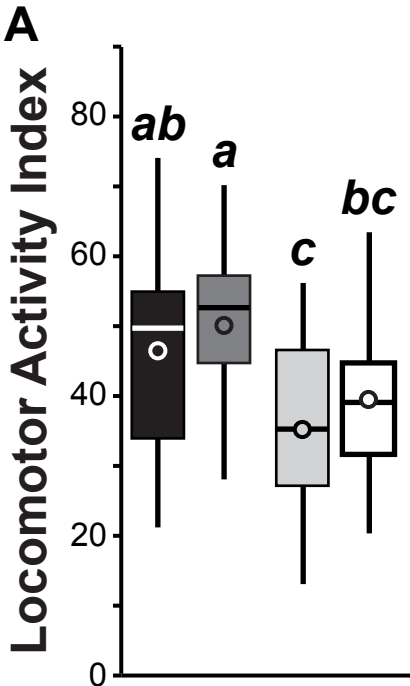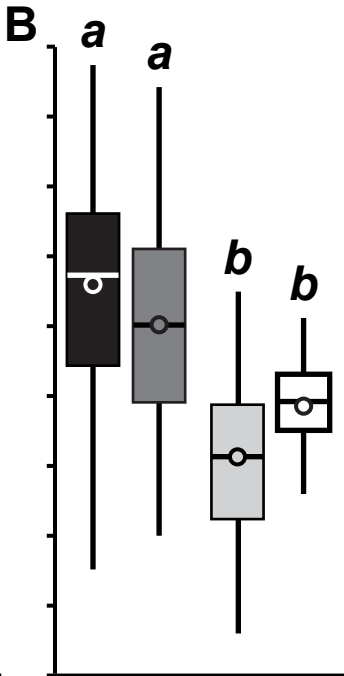

Light (W) (R) (W) (R)  
 AL AL Z6 Z6  
 ♀  
 n 30 30 30 30

Light (W) (R) (W) (R)  
 AL AL Z6 Z6  
 ♂  
 n 30 30 29 30
